# Supplementary material for: Disposable Stainless-Steel Wire-Based Electrochemical Microsensor for In Vivo Continuous Monitoring of Hydrogen Peroxide in Vein of Tomato Leaf
Source: MDPI journal article supplement (doi:10.3390/bios12010035), 2022-01-12
Supplement: s1 [file s1]

# Supplementary Materials: Disposable Stainless-Steel Wire-Based Electrochemical Microsensor for In Vivo Continuous Monitoring of Hydrogen Peroxide in Vein of Tomato Leaf

Doudou Huo<sup>1,†</sup>, Daodong Li<sup>1,†</sup>, Songzhi Xu<sup>1,†</sup>, Yujie Tang<sup>1</sup>, Xueqian Xie<sup>1</sup>, Dayong Li<sup>2</sup>, Fengming Song<sup>2</sup>, Yali Zhang<sup>3</sup>, Aixue Li<sup>4</sup> and Lijun Sun<sup>1,\*</sup>

**Table S1.** The qRT-PCR primers.

| Gene Name      | Primer Set             |                        |
|----------------|------------------------|------------------------|
|                | Forward Primer (5'–3') | Reverse Primer (5'–3') |
| SLRbohA        | GAGAGTAGGATTGAGCGGT    | GCCTCTTTTCGAGCTTGCT    |
| SLRbohB        | AGGGAATGATAGAGCGTCG    | CATCGTCATTGGACTTGGC    |
| $\beta$ -actin | GTCCTCTTCCAGCCATCCAT   | ACCACTGAGCACAATGTTACCG |

**Table S2.** List of analytical performance of electrochemical methods for detection of H<sub>2</sub>O<sub>2</sub> in the plants.

| Electrode System                                                                                    | Price of Working Electrode | Method                         | Applied Potential | Liner Range       | The Response Time | Sample Application                                       | The Time of Electrode Preparation | Ref        |
|-----------------------------------------------------------------------------------------------------|----------------------------|--------------------------------|-------------------|-------------------|-------------------|----------------------------------------------------------|-----------------------------------|------------|
| WE: Au nanodots-ITO<br>CE: Platinum wire<br>RE: Ag/AgCl wire                                        | 0.5 \$                     | Differential pulse voltammetry | −0.90V            | 0~1000 $\mu$ M    | No description    | Detection of the direct tomato leaves (3mg)              | 5 min                             | 25         |
| WE: HRP/Cys/AuNPs/ITO<br>CE: platinum foil<br>RE: Saturated calomel electrode                       | 1 \$                       | Amperometric                   | −0.15 V           | 8~ 3000 $\mu$ M   | Less than 5 s     | Detection of the extraction solution of the plant leaves | More than 12 hours                | 29         |
| WE: Hb/SWCNTs/CFUMEs(8 $\mu$ m)<br>CE: Pt wire (0.1 mm)<br>RE: Ag/AgCl <sub>(sat. KCl)</sub> (1 mm) | 1 \$                       | Amperometric                   | −0.1V             | 4.9~405 $\mu$ M   | No description    | Detection of aloe leaves In vivo and continuous          | More than 1 hour                  | 24         |
| WE: HRP/colloidal Au/pPA/Pt electrode (1 mm)<br>CE: Pt wire<br>RE: Saturated calomel electrode      | 10 \$                      | Amperometric                   | 0 V               | 0.42~1500 $\mu$ M | Within 5 s        | Detection of the extraction solution of the plant leaves | More than 18 hours                | 27         |
| WE: Platinum disc microelectrode(0.050 mm)<br>RE: Silver epoxy coat, Ag/AgCl <sub>(sat. KCl)</sub>  | 10 \$                      | Cyclic voltammogram            | −1.0~0V (−0.7V)   | 0.1mM~100 mM      | No description    | Detection of agave tequilana leaves In vivo              | 20 min                            | 23         |
| WE: Au nanodots /SS electrode (0.1 mm)<br>CE: Pt wire (0.1 mm)<br>RE: Ag/AgCl wire (0.1 mm)         | 0.02 \$                    | Amperometric                   | −0.2 V            | 10~1000 $\mu$ M   | 2.3 s             | Detection of the tomato vein In vivo and continuous      | 20 min                            | This study |

Note: WE, Work electrode; CE, Counter electrode; RE, Reference electrode; Au nanodots-ITO, nano-gold modified indium tin oxide electrode; HRP/Cys/AuNPs/ITO, Horseradish peroxidase/L-Cysteine/gold nanoparticles /indium tin oxide electrode; Hb/SWCNTs/CFUMEs, Hemoglobin/ Single-walled carbon nanotubes/ Carbon fiber ultramicroelectrode; HRP/colloidal Au/ pPA/Pt electrode, Horseradish peroxidase/colloidal Au/poly 2,6-pyridinediamine/platinum wire electrode, Au nanodots /SS, nano-gold modified stainless steel wire electrode.

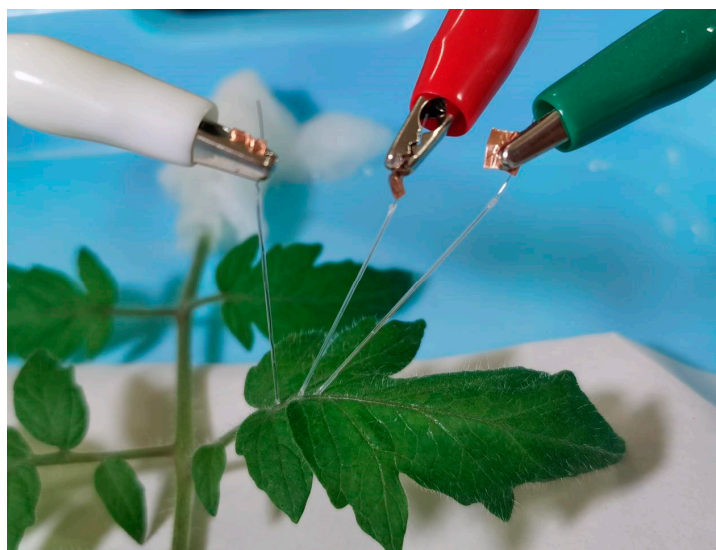

**Figure S1.** The method of high salinity stress for the tomato.

The lateral stem of tomato was cut and the end of the stems was wrapped with cotton soaked in water (control) or high salinity stress.

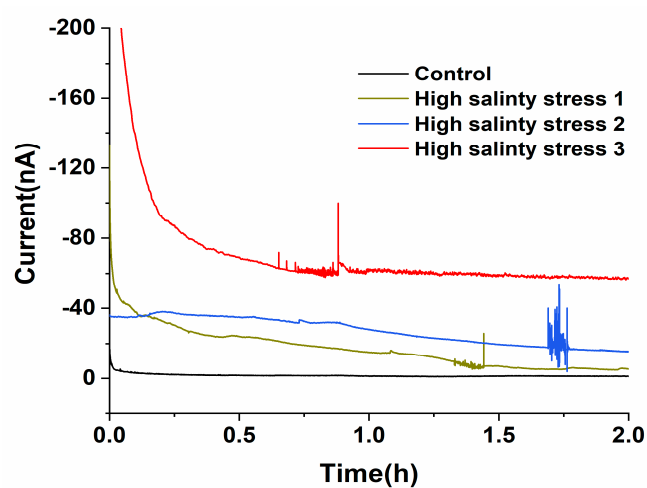

**Figure S2.** In vivo  $\text{H}_2\text{O}_2$  monitoring with stress repeated 3 times.
